# Supplementary material
Source: Springer Nature journal article supplement (https://www.springermedizin.de/resource/supplementary/13058_2013_3369_MOESM3_ESM.pdf/9703970)
Supplement: MOESM3 [file 9703970]

### Figure S3

#### **End-stage tumour-bearing rtTA/MIC mice have adjacent mammary glands that are extensively transformed**

(A) Representative H&E-stained whole mount preparations of inguinal adjacent mammary glands from rtTA/MIC tumour-bearing mice induced with doxycycline for 9 to 11 weeks. A representative control mammary gland is shown for comparison (an un-induced rtTA/MIC). (Scale bars: 0.5mm left; 5mm, right).

(B) Representative H&E-stained adjacent mammary gland sections from rtTA/MIC tumour-bearing mice induced with doxycycline for 9 to 11 weeks. A representative control mammary gland is shown for comparison (an un-induced rtTA/MIC). Sample genotypes are as indicated in (A). (Scale bars: 0.5mm, left; 2.5mm, right).

**A**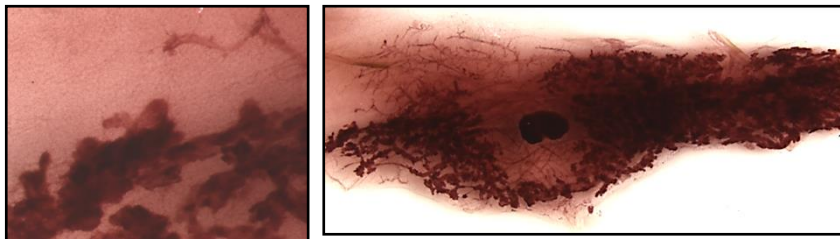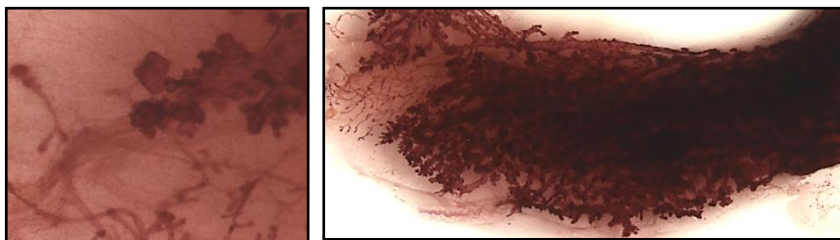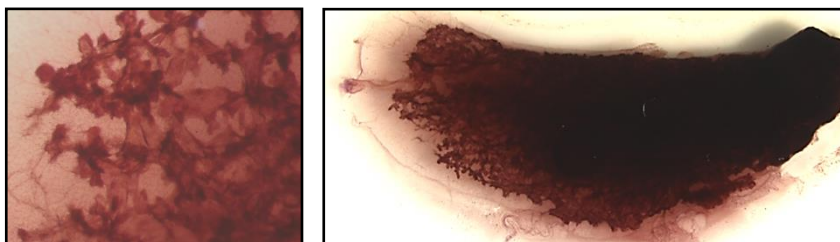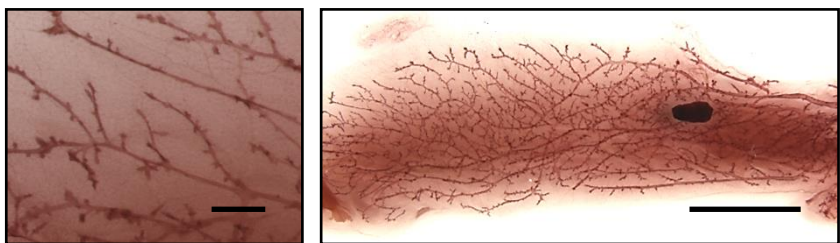**B**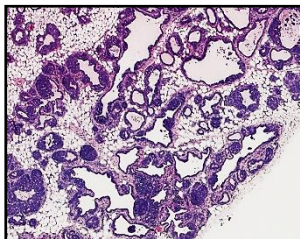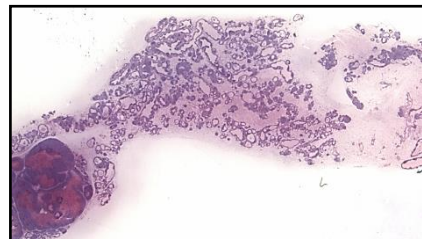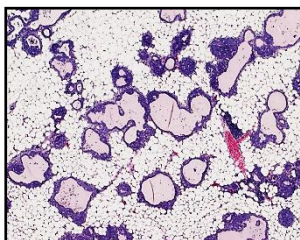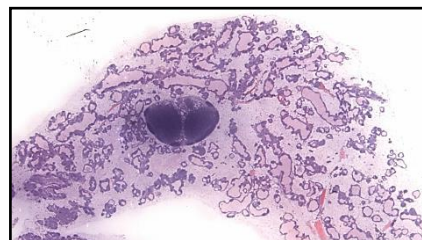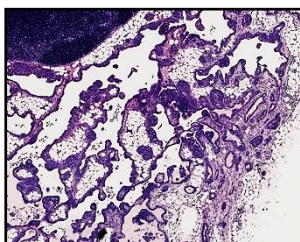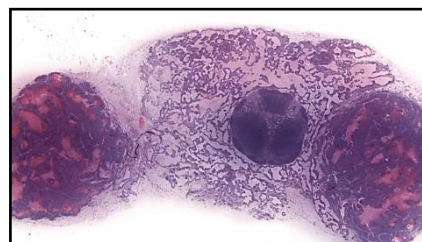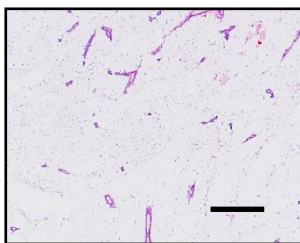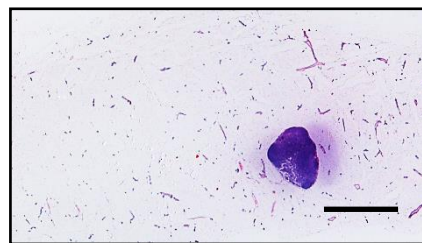

rtTA/MIC (+Dox)

rtTA/MIC (-Dox)
